# Supplementary material
Source: publisher figshare collection journal article supplement (https://karger.figshare.com/ndownloader/files/35096149)
Supplement: Supplementary file 1 [file 35096149]

# Supplemental Information

**Supplemental Figure S1.** *Assessment of publication bias in PASI meta-analysis*

**Legend**: Funnel plot of studies included in meta-analysis of PASI (Fig. 2A). Y-axis: standard error of mean difference in PASI. X-axis: mean difference PASI. Red studies: *Dağdelen et al.* (left) and *Jamshidi et al.* (right).

**Abbreviations**: MD: mean difference; PASI: psoriasis area and severity index; SE: standard error.

**Supplemental Figure S2.** *Sensitivity analysis PASI – Dağdelen et al. and Jamshidi et al. excluded*

**Legend**: Forrest plots of studies that measure psoriasis severity as PASI (Fig. 2A) or BSA (Fig. 2B) and compare mean values between psoriasis and psoriatic arthritis patients, after exclusion of the study results by *Dağdelen et al.* and *Jamshidi et al*.

**Abbreviations**: CI: confidence interval; PASI: psoriasis area and severity index; PsA: psoriatic arthritis; PsO: psoriasis; SD: standard deviation.
